# Supplementary material
Source: PubMed Central journal article supplement (PMC4356534)
Supplement: NIHMS320819-supplement-Supplement1.pdf [file NIHMS320819-supplement-Supplement1.pdf]

## Supplementary Appendix

This appendix has been provided by the authors to give readers additional information about their work.

Supplement to: The National Lung Screening Trial Research Team. Reduced lung-cancer mortality with low-dose computed tomographic screening. *N Engl J Med* 2011;365:395-409. DOI: 10.1056/NEJMoa1102873.

TABLE OF CONTENTS

|            |                                                                 | Page |
|------------|-----------------------------------------------------------------|------|
| Appendix 1 | National Lung Screening Trial Research Team                     | 1    |
| Appendix 2 | Endpoint Verification Process (EVP)                             | 33   |
| Appendix 3 | Table 1 - NLST Diagnostic Evaluation Procedures                 | 34   |
|            | NLST Medical Complications                                      |      |
|            | Table 2 - Lung Cancer by Stage by Screening Round and Trial Arm | 38   |
|            | Table 3 - First-time Treatment by Stage and Trial Arm           | 39   |
| Appendix 4 | Consort Diagram                                                 | 40   |

# APPENDIX 1

## The National Lung Screening Trial Research Team

### **I. Mortality Results from a Randomized Lung Cancer Screening Trial Writing Team**

Denise R. Aberle, MD; Amanda M. Adams, MPH; Christine D. Berg, MD; William C. Black, MD; Jonathan D. Clapp; Richard M. Fagerstrom, PhD; Ilana F. Gareen, PhD; Constantine Gatsonis, PhD; Pamela M. Marcus, PhD; JoRean D. Sicks, MS.

### **II. NLST Executive Committee**

Denise R. Aberle, MD  
Christine D. Berg, MD  
William C. Black, MD  
Timothy R. Church, PhD, MS  
Richard M. Fagerstrom, PhD  
Barbara Galen, MSN, CRNP, CNMT  
Ilana F. Gareen, PhD  
Constantine Gatsonis, PhD  
Jonathan G. Goldin, MD, PhD  
John K. Gohagan, PhD\*  
Bruce Hillman, MD\*  
Paula M. Jacobs, PhD  
Carl Jaffe, MD\*  
Barnett S. Kramer, MD, MPH  
David Lynch, MD  
Pamela M. Marcus, PhD  
Mitchell Schnall, MD, PhD  
Daniel C. Sullivan, MD\*  
Dorothy Sullivan  
James L. Tatum, MD\*  
Carl J. Zylak, MD

\*Former members: JKG, Founding Project Officer and Co-Chair of Executive Committee; BH, Founding Co-Chair of Executive Committee; CJ and DCS, Former Directors, Cancer Imaging Program, Division of Cancer Treatment and Diagnosis, National Cancer Institute; JLT, Former Associate Director, Cancer Imaging Program, Division of Cancer Treatment and Diagnosis, National Cancer Institute.

### **III. Major Contributing Investigators**

#### Project Officer

Christine D. Berg, MD

#### Principal Investigator

Denise R. Aberle, MD

#### Chief Statisticians

Richard M. Fagerstrom, PhD; Constantine Gatsonis, PhD.

#### Lead Epidemiologists

Ilana F. Gareen, PhD; Pamela M. Marcus, PhD.

#### Lead Medical Physicists

Christopher Cagnon, PhD; Dianna Cody, PhD; Glenn Fletcher, PhD; Michael J. Flynn, PhD; Philip F. Judy, PhD; Randell Kruger, PhD; Frederick J. Larke, MS, DABR; Michael McNitt-Gray, PhD; Thomas Payne, PhD; J. Anthony Seibert, PhD; Xizeng Wu, PhD.

#### Lead Site Investigators

##### *ACRIN:*

Gerald Abbott, MD; Denise R. Aberle, MD; Judith K. Amorosa, MD; Richard G. Barr, MD, PhD; William C. Black, MD; Phillip M. Boiselle, MD; Caroline Chiles, MD; Robert Clark, MD; Lynn Coppage, MD; Robert Falk, MD; Elliot K. Fishman, MD; David Gemmel, PhD; Jonathan G. Goldin, MD; Eric Goodman, MD; Eric M. Hart, MD; Todd Hazelton, MD; Elizabeth Johnson, MD; Philip F. Judy, PhD; Ella Kazerooni, MD; Barbara L. McComb, MD; Geoffrey McLennan, PhD, MBBS, FRACP; Reginald F. Munden, MD, DMD, MBA; James Ravenel, MD; Michael A. Sullivan, MD; Stephen J. Swensen, MD; Karl Thomas, MD; Drew A. Torigian, MD, MA; Glenn Tung, MD; Kay H. Vydareny, MD; John A. Worrell, MD.

##### *LSS:*

Peter Balkin, MD; Timothy R. Church, PhD; Mona Fouad, MD; Matthew T. Freedman, MD, MBA; Kavita Garg, MD; Edward P. Gelmann, MD; David S. Gierada, MD; William Hocking, MD; Subbarao Inampudi, MD; Claudine Isaacs, MD; Paul Kvale, MD; David A. Lynch, MB; Howard Mann, MB, BCh; William Manor, DO; Hrudaya Nath, MBBS, DMR, MD; Douglas Reding, MD, MPH; David L. Spizarny, MD; Diane C. Stollo, MD; John Waltz, MD.

#### Supporting Statisticians

Mei-Hsiu Chen, PhD; Donald Corle, MS; Fenghai Duan, PhD; Grant Izmirilian, PhD; Paul Pinsky, PhD; Philip C. Prorok, PhD.

## IV. Major Committees

### Data and Safety Monitoring Board

Current members: Edward A. Sausville, MD, PhD, University of Maryland Greenebaum Cancer Center (Chair); Wylie Burke, MD, PhD, University of Washington; Gene Colice, MD, Washington Hospital Center; Brenda Edwards, PhD, Division of Cancer Control and Population Sciences, NCI, NIH; Scott Emerson, MD, PhD, University of Washington; Russell Harris, MD, MPH, University of North Carolina, Chapel Hill; Jeffrey S. Klein, MD, Fletcher Allen Health Care; Edward L. Korn, PhD, Division of Cancer Treatment and Diagnosis, NCI, NIH; Robert Mayer, MD, Dana-Farber Cancer Institute; Joe V. Selby, MD, MPH, Kaiser Permanente Medical Care Program; David W. Sturges, JD, New Ulm, MN; Bruce W. Turnbull, PhD, Cornell University; Thomas J. Watson, MD Strong Memorial Hospital. Former members: John Fletcher, MD, University of Virginia School of Medicine†; Sylvan Green, MD, Arizona Cancer Center (Chair)†.

† Deceased.

### Endpoint Verification Team

Anthony B. Miller, MD, University of Toronto (Chair); Martin J. Edelman, MD, University of Maryland Greenebaum Cancer Center; William K. Evans, MD, Juravinski Cancer Centre at Hamilton Health Sciences; Robert S. Fontana, MD, Mayo Clinic; Mitchell Machtay, MD, Jefferson Medical College.

### Oversight Committee

Robert C. Young, MD, Fox Chase Cancer Center (Chair); David Alberts, MD, Arizona Cancer Center; David DeMets, PhD, University of Wisconsin Medical School; Peter Greenwald, MD, DrPH, Division of Cancer Prevention, NCI, NIH; Paula M. Jacobs, MD, Division of Cancer Treatment and Diagnosis, NCI, NIH; Theresa C. McCloud, MD, Massachusetts General Hospital; David P. Naidich, MD, New York University Medical School; James L. Tatum, MD Division and Cancer Treatment and Diagnosis, NCI, NIH.

### LSS Screening Quality Assurance Working Group

David S. Gierada, MD (Chair); Kenneth W. Clark, MS, MBA; Kathy L. Clingan; Richard M. Fagerstrom, PhD; Glenn Fletcher, PhD; Michael J. Flynn, PhD; Kavita Garg, MD; Frederick J. Larke, MS, DABR; Guillermo Márquez, PhD; Steven M. Moore, MS; Hrudaya Nath, MBBS, DMR, MD; Peter Ohan; Thomas J. Payne, PhD; Jennifer L. Rosenbaum, MPH; Diane C. Strollo, MD; Xizeng Wu, PhD. Former members: Melissa B. Ford, MSN, PhD; Steven Peace, CTR.

### ACRIN Screening Quality Assurance Committee

Denise R. Aberle, MD; Richard Barr, MD; William C. Black, MD; Jonathan G. Goldin, MD, PhD; Drew Torigian, MD; Kay Vydareny, MD; John Worrell, MD.

### ACRIN Biomarker Research Evaluation Panel and Tissue & Biomarker Oversight Committee:

Denise R. Aberle, MD; Stephen Baylin, MD; Neil Caporaso, PhD; Philip Dennis, MD; Fenghai Duan, PhD; Steve Dubinett, MD; Wilbur Franklin, MD; Constantine Gatsonis, PhD; William Grizzle, MD; Fred Hirsch, PhD; Pierre Massion, MD; Kathy McKeeta-Probeck; John Minna, MD; Edward Patz, MD; Margaret Spitz, MD.

## NLST Trial Investigators

### National Cancer Institute, Division of Cancer Prevention, Bethesda, MD NLST/LSS

#### Project Officer/Chief, Early Detection

##### Research Group

Christine D. Berg, MD

#### Associate Project Officer/Chief, Biometry

##### Research Group

Philip C. Prorok, PhD

#### Chief Statistician

Richard M. Fagerstrom, PhD

#### Lead Epidemiologist

Pamela M. Marcus, PhD

#### Supporting Statisticians

Donald Corle, MS

Ping Hu, ScD

Grant Izmirlian, PhD

Paul Pinsky, PhD

#### Biomedical Engineer

Guillermo Márquez, PhD

#### Information Officer

Dorothy Sullivan

#### Program Specialist

Jennifer Gaegler

#### Former Project Officer

John K. Gohagan, PhD

#### Contract Officer

Susan Hoffman

#### Contract Specialists

Charles Jackson

Erin Lange

Mary Loesch

Evanthia Papadopoulos

### National Cancer Institute, Division of Cancer Treatment and Diagnosis, Cancer Imaging Program, Bethesda, MD

#### Program Director, Diagnostic Imaging Branch, Cancer Imaging Program

Barbara Galen, MSN, CRNP, CNMT

#### Former Branch Chief, Diagnostic Imaging Branch, Cancer Imaging Program

Carl Jaffe, MD

#### Acting Associate Director, Cancer Imaging Program

Paula M. Jacobs, PhD

#### Former Associate Director, Cancer Imaging Program

James L. Tatum, MD

### Editor-in-Chief, Journal of the National Cancer Institute, Bethesda, MD

Barnett S. Kramer, MD, MPH

**American College of Radiology Imaging Network (ACRIN), Philadelphia, PA  
NLST/ACRIN**

Principal Investigator  
Denise R. Aberle, MD

Lead Epidemiologist  
Ilana Gareen, PhD

Chief Statistician  
Constantine Gatsonis, PhD

**ACRIN Headquarters and Data Management Center, Philadelphia, PA**

ACRIN Chair  
Mitchel Schnall, MD

Administrative Staff  
Charles Apgar, MBA  
Anna Boyle  
Tom Caldwell, MBA  
Nancy Fredericks, MBA  
Deborah Harbison  
Donna Hartfeil, RN, BSN  
Sharon Jones  
Steve King, MS, CHE  
Irene Mahon, RN, MPH  
Rosa Medina  
Cindy Masiejczyk  
Leslie Sears  
Peter Zamora

Information Technology  
Hank Brastater, PMP  
Vish Iyer, MS  
Jincy George, MCA  
Dinakar Gopalakrishnan

Protocol Development & Regulatory  
Compliance  
Patricia Blair  
Michael Bradley, MA  
Cheryl Crozier, RN, ASQ, CQA  
Maria Oh  
Nicole Spiese, MS  
Chris Steward  
Mary Kelly-Truran, RN, CCRP  
Tess Thompson, MPhil

Image Management Center  
Erin Cunningham, MHSA

Image Management Center (continued)  
Anthony Levering,  
Kathleen McMurtrie  
Michael Nahill  
Sharlene Snowden  
Kesha Smith  
Fraser Wilton  
Timothy Welsh  
Rex Welsh

Data Management Staff  
Wendell Christie  
Stephanie Clabo  
Roberta Clune  
Natalie Cunningham  
Jamie Downs  
Lindsey Dymond  
Julianne Falcone  
Shani Harris  
Pamela Harvey, MMgt  
Jane Hill  
Laura Hill  
Donna Letizia  
Kendrick Looney  
Hugh McGinley  
Angelee Mean, MHA  
Marcella Moore, MBA  
Ryan Norton  
Valentina Ortico  
Sophia Sabina, MBA, RTRT  
Robert Sole  
JoAnn Stetz, RN, RTT  
Arnold Ssali, MPH  
John Stubblefield  
Tina Taylor  
Shovonna White

**ACRIN Biostatistics Center, Brown University, Providence, RI**

Director

Constantine Gatsonis, PhD

Faculty Statisticians

Mei-Hsiu Chen, PhD

Fenghai Duan, PhD

Bo Lu, PhD

Lead Epidemiologist

Ilana F. Gareen, PhD

Quality of Life Interviewers

Maryann Duggan

Cheryl Souza

Staff Biostatisticians

Amanda Adams, MPH

Sarah Baum, MS

Meridith Blevins, MS

Patricia Fox, MS

Vincent Girardi, MS

Jeremy Gorelick, PhD

Edward Hunt, MS

Quentin McMullen,

Karthikeyan Meganathan, MS

Regina Rendas-Baum, MS

JoRean D. Sicks, MS

Bradley Snyder, MS

Melanie Yeh, MS

**Westat, Rockville, MD**

Project Director

Brenda K. Brewer, MMSc

PLCO Project Director

Barbara O'Brien, MPH

Corporate Officer

Jack Cahill, MA

Protocol Managers

Melissa B. Ford, MSN, PhD

Jennifer L. Rosenbaum, MPH

Data Quality Manager

Kathy L. Clingan

CC Coordinators

Nancy Payte, PhD, MPH, CTR

Helen Price\*

EVP Coordinator

Kristen J. Keating, PhD

PPA/PPC Coordinators

Miriam Galbraith, RN, MPH

Janet Lawler-Heavner, MSPH

Study Managers

Gillian Devereux, RN, MPH

Steven Peace, CTR

Systems Manager

Ramachandra Chanapatna

Systems Staff

Mike Florczyk

Alan Morgan

Peter Ohan

Leon Tiet

Data Processing Manager

L. Ellen Martinusen

Project Administrator

R. Adam DeBaugh

Research Assistant

Vijayasri Narayanaswami

Data Processing Staff

June McSwain

Rhonda Rosario

Jagdish Singh

Medical Record Coders

Terry Lewis

Lois M. Roberts



**Information Management Services, Inc., Rockville, MD**

Corporate Officer  
William Lake, Jr

Project Manager  
Jonathan D. Clapp  
Thomas Riley

Senior Systems Analyst  
Joe Austin

Systems Analyst  
Gordon C. Jones, MS  
Joshua M. Rathmell  
FangFang Xu, MIS  
Michael Young

Senior Programmer/Analyst  
Andrew S. Goodman  
Brian Irons  
Patrick Wright

Senior Programmer  
Crissy Kibic

Programmer  
Laura L. Hawkins

**Care Communications, Inc., Chicago, IL**

Project Director  
Patricia Sheridan, MBA, RHIA

Project Managers  
Nancy Kadish, MS, RHIA, CAPM

Research Managers  
Denise Moline, RHIA  
Rachel Phillips, RHIA

Abstractors and Cancer Registrars  
Michele Adkinson, CCS  
David Creed, RHIT, CTR  
Tammy DeCoste, RHIT, CTR  
Debbie Gembala, RHIA  
Sally Hurst, RHIA  
Elizabeth King, RHIT

Abstractors and Cancer Registrars  
(continued)

Joy Knowles, RHIA, CTR  
Pamela McBride, RHIT, CCS  
Patricia Pangburn, RHIT  
Judy Preston, RHIA  
Karen Stokes, RHIT  
Patricia Tesch, RHIA, CTR  
Susan Wenmoth, RHIA

EVP Coders  
Linda Galocy, RHIA  
Deanna Mandley, RHIT, CCS, CCS-P  
Pamela McBride, RHIT, CCS (Arbitrator)  
Gail Orvis, RHIT, CCS

## NLST/LSS Screening Center Staff

### Georgetown University Medical Center, Washington, DC

#### Principal Investigators

Edward P. Gelmann, MD  
Claudine Isaacs, MD

#### Co-Principal Investigator and Lead Radiologist

Matthew T. Freedman, MD, MBA

#### Radiologists

Alphonso Dial, MD  
Letitia Clark, MD  
Lawrence Cohen, MD  
Joanne Gerber, MD  
Carlos Jamis-Dow, MD  
Erini Makariou, MD  
Ed Smith, MD

#### Study Coordinators

Amy Garrett, MA, CCRC  
Colleen McGuire, RN, MSN  
Sarah Neff, MPH  
Tara Riley

#### Medical Records Abstractors

Alex Barrera, CTR  
Sara Cantrell, CTR  
Glynis Marsh, CTR  
Chripina Wray, CTR  
Baigalmaa Yondonsambuu, MD, CTR

#### Medical Record Coordinator

Ulander Giles

#### Recruitment Coordinator

Morgan Ford, MPH

#### Data Managers

Venus Brown  
Amy Lita Evangelista  
Tiffanie Hammond  
Jillian Nickel

#### Research Assistants

Michael Brangan  
Michele Lee  
Cindy Lin

#### CT and X-Ray Technicians

Elanor (Candi) Adkins  
George Armah  
Christopher Blue  
Venetia Cooke  
Natalie Gray  
Marianna Gustitis  
Lakisha Hawkins  
Grace Isaacs  
Mimi Kim  
Malcolm King  
Kanya Kumbalasiri  
Robin Laura  
Kelly McDaniel  
Alem Mulugeta  
Leroy Riley  
Shane Sorrell  
William Thomas  
Lisa Woodard

## **Henry Ford Health System, Detroit, MI**

### Principal Investigator/Pulmonologist

Paul Kvale, MD

### Co-Investigators/Epidemiologists

Christine Cole Johnson, PhD

Martin Tammemagi, PhD, DVM

### Co-Investigators/Radiologists

David Spizarny, MD

Carl J. Zylak, MD

### Co-Investigator/Medical Physicist

Michael Flynn, MD

### Grant Administrators

Evangeline Griesemer

Bonnie Kwit

### Clinical Staff

Patricia Fantuz

Beth McLellan

Dawn Simmons

### Programmer

Yasmeen Hafeez

Noel Maddy

### Data Managers

LaTonja Davis

Rodkise Estell

Susanne Kozakowski

Jennifer Rowe

Merideth Stanley

Xiuli Zhang

### Abstractors

Mary Ellen Frebes

Margaret Paquette

Mirjana Tecmire

Claudia Tye

Laura Young

### Biostatisticians

Gordon Jacobsen PhD

Steadman Sankey, PhD

Lonni Schultz, PhD

### Project Coordinators/Research Staff

Kalin Albertsen

Karen Broski

Gena Kucera, PhD

Kathleen Poler, MPH

Cheryl Spoutz-Ryan

Dawn Thomas, MPH

### Data Entry Staff

Deborah Greene

Cynthia Hill

Kathleen Young

### Interviewers

Karen Bellware

Kay Bohn

Nancy Caird

Helen Fink

Sandra Fiarman

Melissa Houston

Ann Jolly

Carissa Krzeczowski

Cynthia Mack

Lakeshia Murray

Anna Nanovski

Debra Rempinski

Heather Tumberlinson

Debbie William

### Administrative Support

Eleace Eldridge-Smith

Vanessa Graves

Nora Szabo

## **Marshfield Clinic Research Foundation, Marshfield, WI**

### Principal Investigator

Douglas Reding, MD, MPH, FACP

### Co-Principal Investigator

William Hocking, MD

### Radiologist

William Manor, DO

### Pulmonologist

John Crump, MD

### Medical Physicist

Randall Kruger, PhD

### Epidemiologist

Robert Greenlee, PhD

### Study Coordinator and Manager

Karen Lappe, BSN

### Assistant Manager and Data Manager

Deb Multerer

### Medical Records Abstractors

Denise Kriescher, RN

Amy Vieth, BSN

Sheila Wein, BSN

### Medical Abstraction

Dawn Fuehrer

Christine Gjertson

June Krebsbach

Craig Kuhlka

Karen Luttrop, CTR

Judy Netzer

Jean Wegner

### Recruiter

Virginia Fischer, MS

### CMA

Kay Mathiesen-Viergutz

### LPN

Karen Kofka

### Appointment Coordinators

Nikki Jablonsky

Brooke Johnson

Terrie Kitchner

Lin Mueller

Amy Rueth

Shirley Wachholz

### Data Entry/Office Staff

Kari Bohman

Marilyn Bruger

Kari Ranae Kramer

Katie Kuenhold

Camille Mueller

Cathy Mueller

Laura Multerer

Sue Zahradka

### Radiologists

Janan Alkilidar, MD

Nandita Bhattacharjee, MD

Christopher Cangelosi, MD

Robert Carlson, MD

Alon Coppens, MD

Margo Cousins, MD

Barry Edelstein, MD

Kristin Gerndt, MD

Jeffrey Heffernon, MD

Thomas Hinke, MD

Mark Hinson, MD

Lawrence Hutchins, MD

Kristin Lieberman, MD

William Manor, DO

Gerald Mulligan, MD

Emmanuel Omoba, MD

Todd Risa, DO

John Sheflin, MD

Tim Swan, MD

John Warner, MD

Alan Williams, MD

**Pacific Health Research & Education Institute, Honolulu, HI**

Principal Investigator

Lance Yokochi, MD, MPH

Co-Principal Investigator

Peter Balkin, MD

Co-Investigators

Roy Adaniya, MD

Karen Glanz, PhD

James Navin, MD

Vicki Shambaugh, MPH, MA

Frank Tabrah, MD

Bradley Willcox, MD

Paulette Williams, DrPH

Co-Investigator/Senior Biostatistician

Qimei He, PhD

Study Coordinator

Victoria Jenkins, BSN, MEd

Medical Records Abstractors

Kathleen Bow, BSN, Lead

Jean Tsukamoto, RN

Shirleen Hyun

Data Manager

Louisa Turner

Data Assistants

Gladys Hino

Anne Chung

Programmers

Ed Brown

Howard Morrow

Clinic Supervisors

Kimberly Stryker, RN

Helene Shiratori, BSN

Research Associates

Peggy Lau

Donna Au

Recruitment / Retention

Wendy Francis

Liz Dolan

Research Assistants

Jazman Brooke

Marilyn Calulot

Victoria Chun

Kathryn Rabanal

Joy Tani

Cheryl Lewis

June Morfit

Amy Brunst

Constance Elbon-Copp

William Huynh

Myrle Johnson

Esther Nakano

Lilian Villaruz

**University of Alabama at Birmingham, Birmingham, AL**

Principal Investigator

Mona N. Fouad, MD, MPH

Co-Principal Investigator and Lead Radiologist

Hrudaya Nath, MD

Co-Principal Investigators

William C. Bailey, MD

Robert Garver, MD

Physicist

Xizeng Wu, PhD

Radiologists

Dale Brawner, MD

Ian Malcomb, MD

Desiree Morgan, MD

Patricia C. Sanders, MD

Arthur Sandy, MD

Martin Schwartz, MD

Satinder Singh, MD

Pulmonologist

Mark Dransfield, MD

Study Coordinators

Darlene Higgins

Alisha Moore, CRNP

Data Management Staff

Aras Acemgil

Tony Blake

Jing Lee

Sam Quattlebaum

Julie Schach

Data Entry

Tawny Martin

Lead Abstractor

Rekha Khatri, MD, MPH, CTR

Medical Records Abstractors

Wahied Gendi, MD

Beverly Powell, CRNP

Clinical Center Staff

Carolyn Johnson, RN

Julie Sears, RN

Interviewers/Schedulers

Shari Jordan

Vicki Prayer

Carole Walker

Recruitment/Retention Staff

Mel Johnson

Joanice Thompson

**University of Colorado Denver, Aurora, CO**

Principal Investigator

E. David Crawford, MD

Co-Investigators

Paul Bunn, Jr., MD

Eduard Gamito

David A. Lynch, MB

Sheryl Ogden, RN

Medical Physicist

Frederick J. Larke, MS, DABR

Project Coordinators

Shannon Pretzel

Lauren Ramsay, PA-C

Carol Vaughn

Clinic Coordinator

Cheri Whiton, RN

Recruitment Coordinators

Donna Sammons

Laura Springhetti

Hispanic Recruitment Coordinator

Sally Tenorio, RN

Medical Records Abstractors

Nichole Cadez

Sydney Laster

Programmer

Colin O'Donnell

Co-Principal Investigator

Kavita Garg, MD

Data Managers

Joe Hughes

Jennifer Garcia Livingston

Garry Morrison

Wendy Moss

Merri Mullennix

Marissa Peters

Hakan Sahin, MD

Meredith Slear

Clinic Assistants

Mike Burck

Carolyn Hill

Emily Jewitt

Imaging Library Assistant

Ryan Pena

Administrative Assistants

Eda Ordonez

Gina Sammons

Student Assistants

Jhenny Hernandez

Alejandra Reyes

Analisa Somoza

**University of Minnesota School of Public Health, Minneapolis, MN**

Principal Investigator

Timothy R. Church, PhD, MS

Co-Principal Investigator

Martin Oken, MD

Co-Investigator

Subbarao Inampudi, MD

Radiologists

Deborah Day, MD

Kevin Edelman, MD

Tammy Fox, MD

Scott Gaerte, MD

Karla Myra-Bloom, MD

Michael Plunkett, MD

Frederick Olson, MD

Paul Rust, MD

Lisa Schneider, MD

Beverly Trombley, MD

Thomas Vahey, MD

Medical Physicist

Thomas J. Payne, PhD

Data and Computer Support Staff

Ann Bangerter

Terri David-Schlegel

Donna DesMarais

Sue Frederickson

Mindy Geisser

Natalya Portnov

Greg Silverman

Frank Strahan

Simone Vuong

Gavin Watt

Joe Woodside

Data and Computer Support Staff

Aaron Zirbes

Medical Records Abstractors and Support Staff

Sophie Breer

Cheri Haselhuhn

Cathy Longen

Candace Mueller

Marianne Rice

Deb Warren

Phoning Staff

Susan Collins

Stephanie Levi

Janet Manual

Phoning Staff

Lea Matous

Phyllis Olsson

Sue Peterson

Christopher Rogers

Mary Lynn Steele

Minneapolis Screening Center Nursing Staff

Patty Beckmann

Linda Jurjans

Shirley Terrian

Minneapolis Screening Center Administration

Support Staff

Sally Fraki

Martha Fronheiser

Linda Heinrichs

Deb Kirby

Jackie Seivert

Carol Steinberg

Marge Watry

St. Cloud Screening Center Administration

Support Staff

Karen Boyle

Andrew Burnside

Rena Kiffmeyer

Wendy Mosiman

Indianapolis Screening Center Administration

Support Staff

Angie Bailey

Pamela Byrnes

Laura Stark

Mary Weston

Dawn Whistler

Coordinators

Jill Cordes

Deb Engelhard

Administrative Support Staff

Jackie Becker

Peggy Bradley

Jim Fisher

Ryan Lee

Heather McLaughlin

Ana Maria Mendez

Gabrielle Meyer

Deanna Miller

Krista Palmquist

Rosalie Ronan

Brad Sigal



**University of Pittsburgh Medical Center, Pittsburgh, PA**

Principal Investigator

Joel L. Weissfeld, MD, MPH

Co-Investigators

Mark D. Salerno, MD  
Jeffrey Schragin, MD, MPH  
Diane C. Stollo, MD  
Thomas E. Warfel, MD  
Patrick W. Wolfe, MD

Radiologists

Dominick A. Antico, MD  
Matthew T. Bee, MD  
Donald F. Bittner, MD  
William T. Corey, MD  
Robert A. Hawkins, MD  
William T. Herbick, MD  
Mukesh P. Karwat, MD  
Kevin J. Leonard, MD  
Constantine N. Petrochko, MD  
Scott F. Pickering, MD  
Paul E. Smart, MD  
Phyllis J. Walters, MD  
Jane A. Zehner, MD

Coordinator

Jeffrey Schragin, MD, MPH

Recruiters

Karen Augustine  
Sue Misko  
Monica Richel  
Mary Alyce Riley, RN, MSN  
Linda Warren, RN

Data Manager

Kathy McDonough

Medical Record Abstractors

Beverly Rozanok, CTR  
Jeffrey Schragin, MD, MPH

Data and Computer Support Staff

Juanita Helms  
Peggy Olson  
Steve Uttecht  
Mike Wirth

Administrative Support Staff

Roni Atkins  
Lisa Clement, CRNP  
Deb Gurtner  
Laura Jones

## University of Utah Health Science Center, Salt Lake City, UT

### Principal Investigator

Saundra S. Buys, MD

### Lead Radiologist

Howard Mann, MD

### Study Radiologists

Ralph Drostén, MD

Kathleen Murray, MD

Kenneth Nowers, MD

### Physicists

Peter Jenkins, MD

Dave Tripp, MD

### Study Coordinators

Gabe Herron

Eduard Van Stam

Julie Varner

### Research Nurse

Karen O'Toole, RN

### Data Managers

Cassie Olson

Derek Omori

### Data Collection and Data Entry Staff

Adriane Andersen

Neil Argyle

Jennifer Avrin

Jennifer Bacon

Mark Broschinsky

Chani Montalbo

Kimberly Nolan

Anne Randall

Karen Schleip

Scott J. Sheltra

Roger Tischner

Christopher Toyn

Kyle Turner

Brianne Whittaker

Eddy Wicklander

Jacob Wolf

### Recruitment Staff

Cherie Dalton

Briar Doi

Jeff Childs

Lisa Gren

Anne Randall

Darcy Watson

### Lead /Medical Record Abstractor

Julie Varner, CPC, CTR

### PACS Administrator

Tony Jones

### Medical Imaging Manager

Bruce Neilson

### Radiology Technicians

Hector Ahumada

Hassan Bourija

Christine Brown

Barbara Ferris

Leanne Hadfield

Kylee Hansen

Jeffrey Koford

Sally Kopesec

Amy Lloyd

Mindy Lofthouse

Saeed Matinkhah

Virginia May

Shanna Nichols

Alesis Nieves

Misty Oviatt

Nicole Richardson

Angela Lee Rowley

Ellen Sandberg

Dave Scholl

Shauna Lyn Seguin

David Shea

Suzanne Smith

Patricia Ann Street

Marcie Walters

Ralph Weiben

Lynly Wilcox

Ray Zisumbo

**University of Utah Boise Satellite Center, Boise, ID**

Co-Principal Investigator

Thomas M. Beck, MD

Lead Radiologist

John S. Waltz, MD

Study Radiologists

Shane Ball, MD

Todd B. Burt, MD

Elaine N. Daniel, MD

Quinn A. DeMordaunt, MD

Michael T. Fisher, MD

Michael A. Fuchs, MD

Bruce E. Hubler, MD

Chris J. Jennings, MD

Richard H. Lane, MD

Craig E. Leymaster, MD

Loren C. Macey, MD

Steven V. Marx, MD

James R. Maxwell, MD

Brent D. Nelson, MD

Physicist

Jeff Fairbanks, PhD

Study Coordinator

Bonita Wohlers, RN, MS

Data Manager

Jill Heinz

Administrative Assistant

Kathy Berreth

PACS Administrator

Randy Marshall

Medical Imaging Manager

Jerry Brekke

MI Staff

Kelly Jones

Radiology Technicians

Amber Barrow

Douglas Bashford

Barry Clot

Troy Cook

Leslie Dobson

Andrea Hamilton-Foss

William Hanson

Jan E. Hyder

Cindy Lewis-Burke

Stacey Mitchell

Marlea Osterhout

Karen Patella

Phillip Peterson

Sandra Schornak-Curtis

Lisa Sirianni

Larry Stoller

Korinna Vigeant

Cheryl Whistle

Jeff Yates

## Washington University School of Medicine, St. Louis, MO

### Principal Investigator

Gerald Andriole, MD

### Co-Principal Investigator and Lead Radiologist

David S. Gierada, MD

### Study Radiologists

D. Claire Anderson, MD

Sanjeev Bhalla, MD

Andrew J. Bierhals, MD

Jason Bronfman, MD

Harvey S. Glazer, MD

Fernando R. Gutierrez, MD

Guillermo Geisse, MD

Lawrence M. Kotner, MD

Cylen Javidan-Nejad, MD

Kianoush Rezai, MD

Stuart S. Sagel, MD

Janice W. Semenkovich, MD

Marilyn J. Siegel, MD

Dallas Sorrel, MD

Pamela K. Woodard, MD

### Physicists

David Engelhart, MS

Glenn Fletcher, PhD

### Study Coordinator

Robin Haverman, RT

### Site Coordinators

Angela Campbell, RT

Vivien Gardner, RN, BSN

Danielle Gherardini, RN, BSN

Lynn Hoese, RN

Ruth Holdener, RT

Louise Ledbetter, RN

Patricia Nieters, RN, BSN

Cynthia Reiners, RN

Jeanine Wade, RT

Mary Wiseman, RN

### Data Manager

Patricia Ruelweler

### Data Entry Staff

Rochelle Williams

### Programming Staff

David Chi

Tim Budd

### Lead Abstractors

Sydney Laster

Janise Webb

### Medical Records Abstractors

Celia Stolin, RHIT

### Medical Record Clerical Staff

Kathy Garrett

Elizabeth Fleming

### Clinical Center Staff

Elaine Freesmeier

Jennifer Frye

Deborah Graham

Helen Kaemmerer

JoAnn Nevilles

Kathy Taylor

### CT Image Library Staff

James Blaine, DSc

Kenneth Clark, MS, MBA

David Gierada, MD

Paul Koppel, PhD

David Maffitt, MS

Stephen Moore, MS

Joan Moulton

Stanley Phillips

Fred Prior, PhD

Mary Wolfsberger

### CTIL Image Viewers

Angela Cosas

Sooah Kim, MD

Miyoung Kim, MD

Yuting Liang, MD

Patricia Ruelweler

Rochelle Williams

### Biostatistician

Thomas Pilgram, PhD

### Telephone and Recruitment Staff

Amy Haas

Divine Hartwell

Dana Roeshe

### Administrative Support Staff

Adelheid Lowery, RN

Shelly Meese

Kate Naughton

Roberta Yoffie, RT

## Washington University School of Medicine, St. Louis, MO (continued)

### Imaging Quality Assurance

James Blaine, DSc  
Kenneth Clark, MS, MBA  
Paul Koppel, PhD  
David Maffitt, MS  
Stephen Moore, MS  
Fred Prior, PhD  
Stanley Phillips  
Kirk Smith

## ACRIN Screening Center Staff

### Beth Israel Deaconess Medical Center, Boston, MA

#### Principal Investigator

Phillip M. Boiselle, MD

#### Co-Investigator

Richard Schwartzstein, MD

#### Physicist

Pei-Jan P. Lin, PhD

#### CT Manager

Tim A. Parritt

#### Diagnostic Radiology Manager

Elisabeth A. Grady

#### Study Coordinator

Lisa Damon, MS

#### Research Nurses

Sharon Gard, RN  
Robin Griggs, RN  
Alexis Potemkin, RN

#### Research Associate

Mary M. Pollock, RN

#### Research Assistants

Sara Mc Clellan, MA  
Melissa Laron, MS

#### Regulatory Staff

Tamara Owens

## Brigham and Women's Hospital, Boston, MA

#### Principal Investigators

Philip Costello, MD, FACR, FRACR  
Francine L. Jacobson, MD, MPH  
Philip F. Judy, PhD

#### Co-Investigators

Andetta R. Hunsaker, MD  
Paul W. Spirn, MD  
Beatrice Trotman-Dickenson, MD, MBBS

#### Study Coordinators

Voula E. Christopoulos  
Ivana K. Kazda, DDS, MPH  
Regina C. MacDougall, RN, BSN, CVN  
Annmarie Walsh

#### Medical Physicist

Richard D. Nawfel, MS

#### Radiology Technicians

Robert Berger  
Pearl Chan  
Mark Delano  
Jeffrey Geiger  
Carl Krinopol  
Ann D. McGinnis  
Angela M. McLaughlin  
Raymond Weatherby

**Brown University, Rhode Island Hospital, Providence, RI**

Site Principal Investigators

Gerald Abbott, MD  
Glenn Tung, MD

Co-Investigator

Martha Maineiro, MD

Research Coordinators

Lila Camara  
Cindy Cobb  
Wendy Smith

Research Associates

Susan Foley  
Elizabeth Morrell  
Diane Romano

Secretary

Darlene Guillette

**The Cancer Institute of New Jersey, New Brunswick, NJ**

Principal Investigator

Judith K. Amorosa, MD

Co-Investigators

Joseph Aisner, MD  
Murray Backer, MD  
Mark Bramwitt, MD  
Victor de Carvalho, MD  
Robert Epstein, MD  
Peggy Joyce, APN  
John E. Langenfeld, MD  
Ann Reinert, APN

Research Team

Kevin DeMarco, MD  
Stuart Lutzker, MD  
Rita Musanti, APN  
Steven Shiff, MD  
Tammy Wolfsohn, MS

Study Coordinators

Marisol Furlong  
Colleen Hudak  
Andrea Hugill, RD  
Srivani Konduri  
Elayne Weslowsky

Laboratory Technicians

Sharon Carmen  
Denise L. Foster  
Kenneth Hansen  
Bernadette Pennetta  
Linda V. White

Medical Physicist

Robert Tokarz, MS, DABR

Regulatory Staff

Maryann Trotta

Recruiter

Ana Birofka

**Dartmouth-Hitchcock Medical Center, Lebanon, NH**

Principal Investigator

William C. Black, MD

Co-Principal Investigators

Claudia J. Kasales, MD

Petra J. Lewis, MB

Physicist

John B. Weaver, PhD

Study Coordinator

Suzanne B. Lenz, MA

Project Assistants

Angelica C. Barrett

Raymond X. Dauphinais

Jennifer R. Heinz

Matthew K. Siemionko

AmiLyn Taplin

Lisa Scott Wasson, MS

Recruitment

Linda DeAlmeida

Sharon Longacre

Katherine Meagher

Carol M. Moser

Student Assistants

John K. Lawlor, III

Casey O'Quinn

CT Technologists

Nancy E. (Krieger) Black

Heather L. Bradley

Jill K. Bronson

Timothy Cosgrove

Mark K. Haron

Donna King

Pamela M. Mazuerk

Neil F. O'Donnell

Daniel J. Pluta

Terry J. Sackett

Ginette D. Turgeon

X-Ray Technologists

Henry Albano

Courtney Bell

Jerry Bergen

Gail Bizer

Nicole M. Carmichael

Crista Cimis

Stephanie Davis

Tony DeAngelis

Gail Fellows

Charlie Fenton

Joy Ferola

Nancy Gankiewicz

Dorothy Hastings

Chris Howell

Mary E. Johnson

Mary Krisk

Heather Lancor

Christie Leary

Maurice LeBlanc

Adam Leming

Mandie Leming

Dawn Mead

Michael Milacek

Jamie Mood

Heidi Nordstrom

Carolyn Palazzolo

Jeremy Pierce

Richard P. Remitz

Jessica Rider

Kathleen A. Robbins

Brenda Sleasman

Jason Spaulding

Cam Vashel

Amie Welch

Linda White

Mark Whitty

**Emory University School of Medicine, Atlanta, GA**

Principal Investigator

Kay H. Vydareny, MD

Research Interviewer

Laura N. Myers

Clinical Research Coordinator

Angela M. Williams, RN

Data Entry

Eric Deaton

Physicist

Andrew Karellas, PhD

Research Project Coordinators

Leeta Grayson, MPH

Carlotta McCalister-Cross

Sherri Mesquita, MSW

Anne Nguyen, MPH

**Jewish Hospital Heart and Lung Institute, Louisville, KY**

Principal Investigator

Robert Falk, MD

Research Coordinators (continued)

Sarah Landes, MS

Jacinta Mattingly, RN, OCN

Margaret Oechsli, PhD, CCRP

Bethany Pitino

Shawn Sams, RN

Olga Soukhanova, MD

Site Sub Investigators

Sharon Maxfield, MD

Kevin Thomas

Director, Cancer Services

Laura Brenzel, RN, OCN, MBA

Data Management Assistants

Priscilla Bland

Sheron Bube

Tricia Hoffa

Becky McElsain

Lead Coordinator

Pamela Allen, RN, CCRP

Research Coordinators

Denise Brooks, RT

Carla Chadwell, RN

Elizabeth Couch, CCRP

Amanda DeVore, MHSA

Rubenia Flores, MD

Melba Francis, RN

Medical Assistant

Demetria Johnson

Data Abstractors

Cathy Francow

Stephenie Johnson

Pam Senn



**Johns Hopkins University School of Medicine, Baltimore, MD**

Principal Investigator

Elliot K. Fishman, MD, FACR

Sub-Investigators

Karen M. Horton, MD

Leo P. Lawler, MD

Study Managers

Lynne Bradford

Gale Christensen, RN

Research Coordinators

Janet Bishop

Laura Motley

Deborah Robertson

Robin Stewart

Physicist

Mahadevappa Mahesh, PhD

Research Assistants

Heather Bishop Blake

Holly Bradford

Jenna Bradford

James Burner

Jeremy Christensen

Research Assistants (continued)

Jennifer Christensen, MB, TM

Carmen Guzman

Jennifer Kasecamp

Jennifer Bishop Kaufmann

Daniel Kimball

Zipporah Lewis

Sheila Moesinger, RN

Susan Walsh, RN

Karen Taylor

Bio Markers

Rex Yung, MD

Mingying Zeng, MD

IT Support Staff

Greg Gambill

Sarah Merrill

## **Mayo Clinic, Jacksonville, FL**

### Principal Investigator

Barbara L. McComb, MD

### Co-Principal Investigator

Elizabeth A. Johnson, MD

### Co-Investigators & Quality Assurance

Howard I. Jolles, MD

Ronald S. Kuzo, MD

Richard L. Morin, PhD

### Study Coordinators

Reza Abaya, RN

Deborah Chewar, RN

Patricia Shwartz

### Laboratory Technicians

Susan Allen, MT

Shalonda Manning

### Pulmonary Technicians

Mary Adams

Zafar Awan

Lisa Beagle

Deanna Cape

Tanya Zeiger

### X-Ray Technologists

Laurie Amendolare

Noel Bahr

Minnetta Belyea

Tara Berg

Mia Burkhard

Lisa Cottrell

Katherine DeAngelis

Melanie Dvorak

L. Heather Binnicker Gay

Kelly Hatton

Sharon Jacoby

Valene Kennedy

Kathleen Krach

Melissa Laughren

### X-Ray Technologists (continued)

Cindy Lavergne

Marsha Lawrence

Jeannette Lynch

Amber McDonald

Felix Mestas

Julie Moody

Carrie O'Brien

Janice Pitts

Brenda Polding

Lindsay Richardson

Karen Robinson

Amy Warren

Holly Washburn

Erik Wilson

Luis Zagarra

### CT Technologists

Karen Mathews Batton

David Chellini

Kathleen DeWitt

Darlene R. Fleming

Christi Newton-Foster

Kathleen Krach

Renee MacDonald

Carrie O'Brien

Jennifer Ott

Julie Peterson

Michele Sallas

Michael Teepe

Rachel Thomas

Kathy Torrence

Luis Zagarra

### Coordinator Clinical Radiology

Jodi Hildestad

**Mayo Clinic, Rochester, MN**

Principal Investigator

Stephen J. Swensen, MD

Co-Investigators

Thomas E. Hartman, MD  
James R. Jett, MD  
Cynthia H. McCollough, PhD  
David E. Midthun, MD

Study Coordinators

Boleyn R. Andrist  
Nancy E. Hanson  
Connie L. Sathre  
Laura D. Schroeder  
Jacqueline R. Sheeran  
Lana C. Walters

Other Study Staff

Cynthia L. Andrist  
Aaron O. Bungum  
Cathy L. Bornhorst  
Dawn M. Deno  
Tami S. Krpata  
Ann M. Lambrecht  
Christine M. McKey  
Delores K. Prudoehl  
Helena R. Richter

**Medical University of South Carolina, Charleston, SC**

Principal Investigator

James Ravenel, MD

Co-Principal Investigator

Philip Costello, MD

Study Coordinator

Alan Brisendine

Research Associates

Tricia Adrales-Bentz, MHA, CCRP  
Krystal Arnold  
Brad Benjamin  
Andrew Dodd, MS

Research Associates

John Keller  
Tamara Saunders

QC / Internal Auditor

Susan Shannon

Data Entry

Laura Bailey  
Hanna Comer  
Joy Espiritu, MHA  
Stephanie Helwi  
Brandy Mack-Pipkin  
Paola Spicker, MBA

## **Moffitt Cancer Center, Tampa, FL**

### Principal Investigators

Robert Clark, MD  
Lynn Copping, MD  
Todd Hazelton, MD

### Co-Investigator

Melvin Tockman, MD, PhD

### Lead RAs

Beth Evans, RN, CCRC  
Nina Wadhwa, MSPH

### Study Coordinators

Natalie Baptiste  
Courtney Eysmans  
Naima Vera-Gonzalez

### Data Specialists

Lori Hamm  
Veenu Harjani  
Anna Sear

### Management Assistant

Susan Blackwell, MPH

### Laboratory Technicians

Adys Fernandez  
Edwin Williams

### Medical Physicist

Kenneth A. Coleman, ME, DABMP, DABSNM

### Computer Support

Jay Afiat

### Regulatory Staff

Lori Kirchoff

### Radiology Department Staff

Rob Bowman  
Chris Brothers  
Barry Cohen  
Nicole Fields  
Richard Guzman  
Celeste Monje  
Winston Sterling  
Loretta Thorpe  
Kevin White  
Buddy Williams

## **Northwestern University Feinberg School of Medicine, Chicago, IL**

### Principal Investigator

Eric M. Hart, MD

### NLST Research Coordinator

Erin Nekervis

### NLST Research Associates

Andrea Franco  
Irena Glick  
Marcello Grigolo  
Yassminda Harts  
Arthur Migo  
Kelli P. Rockwell  
Adam Stein  
Ryan Weyls, MA

### Medical Physicist

Eric Berns, PhD

### Technologists

Michele T. Biringer  
Angela Del Pino  
Peter Dubbs  
Glenna M. Fehrmann  
Alan Lee Goodwin  
Loretta Granger  
Julie Haglage  
Jenny Hirschy  
Mollie King  
Jodi Wietharn Kristopher  
Nicole Matetic Mac  
George Mahony  
Armen Markarian  
Martha Ramirez  
Michael Taylor  
Kelli M. West

**Ochsner Medical Center, New Orleans, LA**

Site Principal Investigator

Michael A. Sullivan, MD

Co-Investigator

Charles C. Matthews, MD

Medical Physicist

Jerome Jones, PhD

Study Coordinators

Aura Cole

Pamela Dow, RN

Jacqueline Fearon

Brent Fodera, MS

Barbara Ginther, RN

Rachel L. McCall

Shannon Williams, RT

Serelda Young, RN

Research Assistants

Cristine Juul

Angele LaFleur

Alison Schmidt

Shannon Wright

Katherine Lohmann

Lisa Pineda

Data Entry Staff

Sheila Greenup, RN

Kelly McNulty

Stephanie Pawlak

Heather Porter

Data Support Staff

Teresa Lanning, RN

Debra Loria, RN

## **St. Elizabeth Health Center, Youngstown, OH**

### Principal Investigators

Richard G. Barr, MD, PhD  
David Gemmel, PhD  
Albert Cook II, MD

### Research Secretary

Jo Ann Hallsky

### Study Coordinators

Alice DuChateau, MSN  
Catherine Engartner, MSN  
Dianalyn M. Evans, BSN  
Cheryl Love  
Patricia Schuler, MSN

### Research Associates

Anthony Boulos  
Pritha Dalal  
Ben Dickstein  
James Evans  
Kaylene Evans  
Mary Gemmel  
Sarah Hallsky  
Phil Hoffman  
Craig Hritz  
Lorraine Kerchum  
Mallory Kolich  
Mark Kolich  
Melody Kolich  
Neha Kumar  
Judith Lobaugh  
Dayna Love  
Melissa Love  
Maria Marchese  
Deana Nelson  
Carrie Petkus  
Marcella Petruzzi, MT  
Cristina Raver  
Erin Schuler  
David Schultz

### Physicist

Robert Kobistek

### Lab Technicians/Phlobotomists

Jacqueline Jackson  
Johanna Ziegler

### Respiratory Technicians

Jennifer Fleischer  
Linda L. Welch

### Radiology Technicians

Marian Acerra  
Beverly Brittain  
Lisa Conklin  
Cindy Cyphert  
Brenda Delfosse  
Leanne Franceshelli  
Joan Fuller  
Donna Garland  
Peggy J. Gocala  
Mauren Grunenwald  
Diane Kowalik  
Sharon L. Kurjan  
Patricia Lavernick  
Julie Maderitz  
Renee Metz  
Roberta Quinn  
Marlene Semansky  
Stacy Smith  
Amy St.Claire  
Pamela Taybus  
Diana Wisler  
Karen Zubena

## **University of California at Los Angeles, Los Angeles, CA**

### Principal Investigator

Jonathan G. Goldin, MD, PhD

### Co-Principal Investigator

Denise R. Aberle, MD

### ACRIN NLST National Study Coordinator

Catherine Duda, MPH

### Nurse Coordinators

Polly Kay, RN

Patty Trapnell, RN

Maria Vlachou, RN

### Physicists

Chris Cagnon, PhD

Michael McNitt-Gray, PhD

### Administrative Staff

Brandon B. Bigby

Audrey Gallego

Gregg Hamm

### Recruiters

Jill Spivak

Maisha Pollard

### Staff Research Associates

Eng Brown

Olivia Campa

Barbara Carter

Sonya Clark

Marvin Flores

### Staff Research Associates (continued)

Judy Ho

Tracy Lee

Barbara Lewis

Janie McMahan

Lea Momongan

Julie Ngo

Adele Perryman

Nicole Rivas

Christina Romo

Kanistha Sookpaisal

Lily Stone

Barbara Voight, NP

Carleaner Williams

### Data Entry

Kellyn Adams

Phi Do

Kerry Engber

Leslie Henry

Michael Khalili

Sandy Morales

Chelsea O'Carroll

Jade Quijano

### Radiology Technologists

Shiva Borgheian

Roger Inatomi

Alfonso Lorenzo

Dinah Lorenzo

Glen Nyborg

Vinis Salazar

Michael Woo

## **University of California at San Diego, San Diego, CA**

### Principal Investigator

Eric Goodman, MD

### Research Associates

Paige Beck

### Regulatory Associates

Paula Beerman

Jean Jacobsen

Roxana Phillips

Alice Vranceanu

### Administrator

Kathleen Voight

### Study Coordinators

Erich Allman

Sabrina Chen

Cristina Farkas

Isabelle Forter

Ganesh Kulkarni

Larissa Low

Paul Marcus

Lonna Matthews

Jessica Silva-Gietzen

Erica Sturgeon

Gina Varner

## **University of Iowa, Iowa City, IA**

### Principal Investigator

Geoffrey McLennan, PhD, MBBS, FRACP  
Karl Thomas MD

### Co-Investigators Radiologists

Brian Mullen, MD  
William Stanford, MD

### Co-Investigator

Eric Hoffman, PhD

### Study Coordinator

Kim Sprenger, RN

### Research Assistants

Andrea Chapman  
Kaylene Crawford  
Jacquie Marietta  
Leslie Kmetty  
Jackie Meier  
Phyllis Pirotte, RN, BSN  
Laurie Rathmell

### Radiology Technologists

Melissa Hudson  
Jered Sieren

## **University of Michigan Medical Center, Ann Arbor, MI**

### Principal Investigator

Ella Kazerooni, MD

### Co-Investigators

Paul Cronin, MD  
Barry Gross, MD  
Aine Kelly, MD  
Smita Patel, MD  
Perry Pernicano, MD

### Lead Research Assistant

Lisa Holloway

### Study Coordinators

Gwen Chalom  
Tami Harper  
Eric Henricks

### Study Coordinators (continued)

Jim Pool  
Diane Shepherd  
Deanna Zapolski

### Medical Physicist

Mitch Goodsitt, PhD

### Recruiter

Hope Hooks

## **University of Pennsylvania School of Medicine, Philadelphia, PA**

### Site Principal Investigator

Drew A. Torigian, MD, MA

### Co-Principal Investigator

Warren Geffer, MD

### Nurse Research Coordinator

D. Lynn Werner, RN, CCRC

### Research Coordinator

Catherine E. Smith

### Data Managers

Byung Kun Choi  
Joon K. Lee

### Research Assistants

Christine Holland  
Jacqueline Matuza, MPH  
Hilary C. Nosker

### Spirometry

William Russell, RPFT

### Physicists

Scott Cupp, MBS  
Michael O'Shea, PhD



## **University of Texas M.D. Anderson Cancer Center, Houston, TX**

### Principal Investigator:

Reginald Munden, MD, DMD, MBA

### Study Coordinators

Melissa Cates

Eric Sanchez

### Research Staff

Michelle Aganon-Acheta, RN

Michael Black

Dalphany Blalock, RN

Cynthia Brown, RN

Hattie Cromwell

Joel Dunnington, MD

Jeremy Erasmus, MD

Gregory Gladish, MD

Sanjay Gupta, MD

Michelle Wann Haynes

Thomas Hensley

Revathy B. Iyer, MD

John Madewell, MD

Tamim Malbari

### Research Staff (continued)

Edith M. Marom, MD

Rodolfo Morice, MD

Sujaya Rao, MS

Carol Read, RN

Bradley Sabloff, MD

Natalie F. Scully, PhD

Sangeeta Tekchandani

Mylene Truong, MD

Danielle Wicks

### Physicists

Dianna Cody, PhD

William R. Geiser, MS

### CT and X-Ray Technicians

Jerry L. Montague

Minesh Patel

Tonda Robinson

## **Vanderbilt University School of Medicine, Nashville, TN**

### Site Principal Investigator

John A. Worrell, MD

### Co-Investigators

Edwin F. Donnelly, MD, PhD

Pierre Massion, MD

### Research Associate

Elizabeth Thielke, RN, MSN

### Research Assistant

Allie M. Bell

### Medical Physicist

David R. Pickens, PhD

### Assistant Administrative Director, Department of Radiology

Walter Allen Bowman, MA, CRA, RT(R)

### CT Senior Specialty Technician

Tina Herron

### Chief Technologist, Nuclear Medicine

Dawn Shone

### Research Volunteer

Brian Chin, MD

**Wake Forest University School of Medicine, Winston-Salem, NC**

Principal Investigator

Caroline Chiles, MD

Co-Principal Investigator

Michael Chen, MD

Study Coordinators

Lisa Harmon

Lisa Hinshaw, MPH

Carolyn Nelson

Research Associates

Donna Biracree

Denise Boyles

Anne Burrough, MS

Amanda Davis

Research Associates (continued)

Elliott Drake

Eileen Frost, MS

Ashley Long

Research Nurses

Elaine Bowman, RN

Susanna Dyer, RN

Patti Peacock, RN

### Endpoint Verification Process (EVP)

NLST's death review process, the EVP, strove to identify deaths whose underlying cause was lung cancer. For the purpose of NLST, these included deaths caused directly by lung cancer, deaths attributed indirectly to lung cancer due to diagnostic evaluation of a suspected (due either to symptoms or a positive screen) or confirmed lung cancer, and deaths associated with treatment of lung cancer. Details of the process are reported in a manuscript currently under consideration at another journal; however, a brief synopsis follows for the interested reader. A computerized algorithm identified deaths requiring review. Deaths selected for review included those with a notation of lung cancer on the death certificate and those occurring among participants ever diagnosed with lung cancer, as well as deaths within six months of a screen suspicious for lung cancer and deaths within 60 days of certain diagnostic evaluation procedures associated with a screen suspicious for lung cancer or a lung cancer diagnosis.

Information concerning deaths selected for EVP was first reviewed by the Chair of the Endpoint Verification Team (EVT). The Chair's assigned cause of death was compared with the death certificate cause of death. If the two assignments agreed with regard to lung cancer, the death was certified. If not, a second EVT reviewer examined the death certificate, the EVP's assignment, and information concerning the death. If the Chair and second reviewer agreed with regard to lung cancer, the death was certified; otherwise, the death was reviewed by a group of three EVT reviewers, including the Chair. A consensus cause of death was assigned by that group.

**APPENDIX 3**  
**Supplement Table 1**

**NLST Diagnostic Evaluation Procedures**

Clinical Procedures:

Clinical evaluation

Radiograph – comparison with historical images

Pulmonary function tests/spirometry

Imaging Procedures:

- Radiograph
  - Bone
  - Chest
  - Other (specify)
- CT
  - Abdomen & pelvis
  - Brain
  - Other (specify)
  - Chest, limited thin section of nodule
  - Abdomen (or liver)
  - Chest, plus contrast-enhanced nodule densitometry
  - Diagnostic chest
  - Chest, low dose helical
  - Chest, limited thin section of entire lung
  - Chest and abdomen
  - Chest, abdomen and pelvis
- MRI
  - Bone
  - Brain
  - Chest
  - Other (specify)
  - Abdomen or liver
- Radionuclide scan
  - Bone
  - Brain
  - Liver
  - FDG-PET scan
  - Gallium
  - Somatostatin receptor
  - Ventilation/perfusion lung
  - Other (specify)
  - Fusion PET/CT scan
- Others
  - Fluoroscopy
  - Ultrasound (specify)
  - Echocardiography

Cytology Procedures:

Sputum  
Bronchoscopic  
Percutaneous transthoracic  
Other (specify)

Biopsy Procedures:

Endobronchial  
Percutaneous liver  
Lymph node – other (specify)  
Lymph node – scalene nodes  
Other (specify)  
Open surgical  
Transbronchial  
Thoracoscopic  
Percutaneous adrenal  
Percutaneous transthoracic yielding histology

Scope Procedures:

Mediastinoscopy/mediastinotomy  
Thoracoscopy without biopsy  
Thoracoscopy with biopsy  
Bronchoscopy without biopsy or cytology

Surgery Procedures:

Lymphadenectomy/lymph node sampling  
Resection  
Thoracotomy

Other Procedures:

Other (specify)  
Thoracentesis  
Unknown

## NLST Medical Complications

### Major Complications:

- Acute respiratory failure
- Anaphylaxis
- Bronchopulmonary fistula
- Cardiac arrest
- Cerebral vascular accident (CVA)/stroke
- Congestive heart failure (CHF)
- Death
- Hemothorax requiring tube placement
- Myocardial infarction
- Respiratory arrest
- Wound dehiscence
- Bronchial stump leak requiring tube thoracostomy or other drainage for more than 4 days
- Empyema
- Injury to vital organ or vessel
- Prolonged mechanical ventilation over 48 hours post-operatively
- Thromboembolic complications requiring intervention
- Chylous fistula
- Brachial plexopathy
- Lung collapse
- Infarcted sigmoid colon

### Intermediate Complications:

- Blood loss requiring a transfusion
- Cardiac arrhythmia requiring medical attention
- Fever requiring antibiotics
- Hospitalization post procedure
- Pain requiring referral to a pain specialist
- Pneumothorax requiring tube placement
- Rib fracture(s)
- Vocal cord immobility/paralysis
- Infections requiring antibiotics
- Cardiac ischemia/ST elevation
- Bronchitis
- Pneumonia
- Pleural effusion
- Sepsis
- Respiratory distress
- Splenomegaly with splenic infarcts
- Mucous plug requiring bronchoscopy
- Steroid-induced diabetes

### Minor Complications:

- Allergic reaction
- Bronchospasm
- Vasovagal reaction/hypotension

Subcutaneous emphysema  
Atelectasis  
Pneumothorax with no chest tube  
Ileus  
Seroma  
Paresthesias/hyperesthesias  
Other (specify)

**Supplemental Table 2: Lung cancer stage by screening round and trial arm.**

|              | T0         |              |            |              | T1         |              |            |              | T2         |              |            |              |
|--------------|------------|--------------|------------|--------------|------------|--------------|------------|--------------|------------|--------------|------------|--------------|
|              | LDCT       |              | CXR        |              | LDCT       |              | CXR        |              | LDCT       |              | CXR        |              |
|              | N          | %            | N          | %            | N          | %            | N          | %            | N          | %            | N          | %            |
| Stage IA     | 133        | 45.4         | 46         | 24.5         | 87         | 47.5         | 31         | 23.5         | 116        | 50.4         | 35         | 24.5         |
| Stage IB     | 27         | 9.2          | 24         | 12.8         | 21         | 11.5         | 11         | 8.3          | 31         | 13.5         | 13         | 9.1          |
| Stage IIA    | 10         | 3.4          | 3          | 1.6          | 11         | 6.0          | 7          | 5.3          | 8          | 3.5          | 9          | 6.3          |
| Stage IIB    | 12         | 4.1          | 10         | 5.3          | 7          | 3.8          | 5          | 3.8          | 5          | 2.2          | 3          | 2.1          |
| Stage IIIA   | 34         | 11.6         | 30         | 16.0         | 14         | 7.7          | 14         | 10.6         | 15         | 6.5          | 18         | 12.6         |
| Stage IIIB   | 30         | 10.2         | 28         | 14.9         | 19         | 10.4         | 12         | 9.1          | 20         | 8.7          | 21         | 14.7         |
| Stage IV     | 47         | 16.0         | 47         | 25.0         | 24         | 13.1         | 52         | 39.4         | 35         | 15.2         | 44         | 30.8         |
| Unknown      | 4          | -            | 5          | -            | 3          | -            | 1          | -            | 7          | -            | 1          | -            |
| <b>Total</b> | <b>297</b> | <b>100.0</b> | <b>193</b> | <b>100.0</b> | <b>186</b> | <b>100.0</b> | <b>133</b> | <b>100.0</b> | <b>237</b> | <b>100.0</b> | <b>144</b> | <b>100.0</b> |



**Supplemental Table 3: First-line treatment<sup>1</sup> by stage and trial arm.**

| First-line treatment |                                         | Stage        |            |              |           |              |           |              |            |              |            |              |            |              |           |              |             | Total        |      |
|----------------------|-----------------------------------------|--------------|------------|--------------|-----------|--------------|-----------|--------------|------------|--------------|------------|--------------|------------|--------------|-----------|--------------|-------------|--------------|------|
|                      |                                         | IA           |            | IB           |           | IIA          |           | IIB          |            | IIIA         |            | IIIB         |            | IV           |           | Unknown      |             |              |      |
|                      |                                         | N            | %          | N            | %         | N            | %         | N            | %          | N            | %          | N            | %          | N            | %         | N            | %           | N            | %    |
| LDCT                 | Surgery only                            | 358          | 86.1       | 63           | 60.6      | 10           | 28.6      | 9            | 23.7       | 8            | 8.1        | 11           | 9.0        | 8            | 3.5       | 6            | 30.0        | 473          | 44.6 |
|                      | Surgery and chemotherapy                | 20           | 4.8        | 28           | 26.9      | 14           | 40.0      | 12           | 31.6       | 10           | 10.1       | 16           | 13.1       | 9            | 4.0       | 0            | 0.0         | 109          | 10.3 |
|                      | Surgery and radiotherapy                | 4            | 1.0        | 0            | 0.0       | 2            | 5.7       | 2            | 5.3        | 3            | 3.0        | 3            | 2.5        | 3            | 1.3       | 0            | 0.0         | 17           | 1.6  |
|                      | Surgery, chemotherapy, and radiotherapy | 6            | 1.4        | 2            | 1.9       | 5            | 14.3      | 5            | 13.2       | 16           | 16.2       | 6            | 4.9        | 3            | 1.3       | 0            | 0.0         | 43           | 4.1  |
|                      | Chemotherapy only                       | 0            | 0.0        | 3            | 2.9       | 2            | 5.7       | 0            | 0.0        | 6            | 6.1        | 19           | 15.6       | 87           | 38.5      | 1            | 5.0         | 118          | 11.1 |
|                      | Chemotherapy and radiotherapy           | 2            | 0.5        | 1            | 1.0       | 2            | 5.7       | 6            | 15.8       | 45           | 45.5       | 50           | 41.0       | 50           | 22.1      | 4            | 20.0        | 160          | 15.1 |
|                      | Radiotherapy only                       | 14           | 3.4        | 4            | 3.8       | 0            | 0.0       | 1            | 2.6        | 7            | 7.1        | 4            | 3.3        | 16           | 7.1       | 1            | 5.0         | 47           | 4.4  |
|                      | Other treatment                         | 3            | 0.7        | 0            | 0.0       | 0            | 0.0       | 1            | 2.6        | 0            | 0.0        | 2            | 1.6        | 4            | 1.8       | 1            | 5.0         | 11           | 1.0  |
|                      | No treatment                            | 8            | 1.9        | 3            | 2.9       | 0            | 0.0       | 1            | 2.6        | 3            | 3.0        | 10           | 8.2        | 40           | 17.7      | 3            | 15.0        | 68           | 6.4  |
|                      | Treatment data incomplete               | 1            | 0.2        | 0            | 0.0       | 0            | 0.0       | 1            | 2.6        | 1            | 1.0        | 1            | 0.8        | 6            | 2.7       | 4            | 20.0        | 14           | 1.3  |
| <b>Total</b>         | <b>416</b>                              | <b>100.0</b> | <b>104</b> | <b>100.0</b> | <b>35</b> | <b>100.0</b> | <b>38</b> | <b>100.0</b> | <b>99</b>  | <b>100.0</b> | <b>122</b> | <b>100.0</b> | <b>226</b> | <b>100.0</b> | <b>20</b> | <b>100.0</b> | <b>1060</b> | <b>100.0</b> |      |
| CXR                  | Surgery only                            | 150          | 76.5       | 57           | 61.3      | 9            | 28.1      | 8            | 19.0       | 5            | 4.6        | 10           | 8.2        | 11           | 3.3       | 2            | 16.7        | 252          | 26.8 |
|                      | Surgery and chemotherapy                | 14           | 7.1        | 24           | 25.8      | 13           | 40.6      | 14           | 33.3       | 17           | 15.6       | 15           | 12.3       | 8            | 2.4       | 0            | 0.0         | 105          | 11.2 |
|                      | Surgery and radiotherapy                | 3            | 1.5        | 0            | 0.0       | 3            | 9.4       | 1            | 2.4        | 2            | 1.8        | 1            | 0.8        | 3            | 0.9       | 1            | 8.3         | 14           | 1.5  |
|                      | Surgery, chemotherapy, and radiotherapy | 3            | 1.5        | 2            | 2.2       | 2            | 6.3       | 3            | 7.1        | 15           | 13.8       | 12           | 9.8        | 7            | 2.1       | 0            | 0.0         | 44           | 4.7  |
|                      | Chemotherapy only                       | 0            | 0.0        | 1            | 1.1       | 0            | 0.0       | 1            | 2.4        | 3            | 2.8        | 18           | 14.8       | 132          | 39.4      | 3            | 25.0        | 158          | 16.8 |
|                      | Chemotherapy and radiotherapy           | 3            | 1.5        | 6            | 6.5       | 4            | 12.5      | 13           | 31.0       | 54           | 49.5       | 46           | 37.7       | 86           | 25.7      | 1            | 8.3         | 213          | 22.6 |
|                      | Radiotherapy only                       | 14           | 7.1        | 0            | 0.0       | 0            | 0.0       | 0            | 0.0        | 6            | 5.5        | 4            | 3.3        | 37           | 11.0      | 1            | 8.3         | 62           | 6.6  |
|                      | Other treatment                         | 0            | 0.0        | 0            | 0.0       | 0            | 0.0       | 0            | 0.0        | 2            | 1.8        | 2            | 1.6        | 9            | 2.7       | 0            | 0.0         | 13           | 1.4  |
|                      | No treatment                            | 8            | 4.1        | 3            | 3.2       | 1            | 3.1       | 1            | 2.4        | 5            | 4.6        | 13           | 10.7       | 38           | 11.3      | 3            | 25.0        | 72           | 7.7  |
|                      | Treatment data incomplete               | 1            | 0.5        | 0            | 0.0       | 0            | 0.0       | 1            | 2.4        | 0            | 0.0        | 1            | 0.8        | 4            | 1.2       | 1            | 8.3         | 8            | 0.9  |
| <b>Total</b>         | <b>196</b>                              | <b>100.0</b> | <b>93</b>  | <b>100.0</b> | <b>32</b> | <b>100.0</b> | <b>42</b> | <b>100.0</b> | <b>109</b> | <b>100.0</b> | <b>122</b> | <b>100.0</b> | <b>335</b> | <b>100.0</b> | <b>12</b> | <b>100.0</b> | <b>941</b>  | <b>100.0</b> |      |

<sup>1</sup>Table includes first-line treatments that occurred within 6 months of diagnosis. “No treatment” includes participants who received no treatment at all or who received first-line treatment after the 6 months following diagnosis.

APPENDIX 4 Consort Diagram

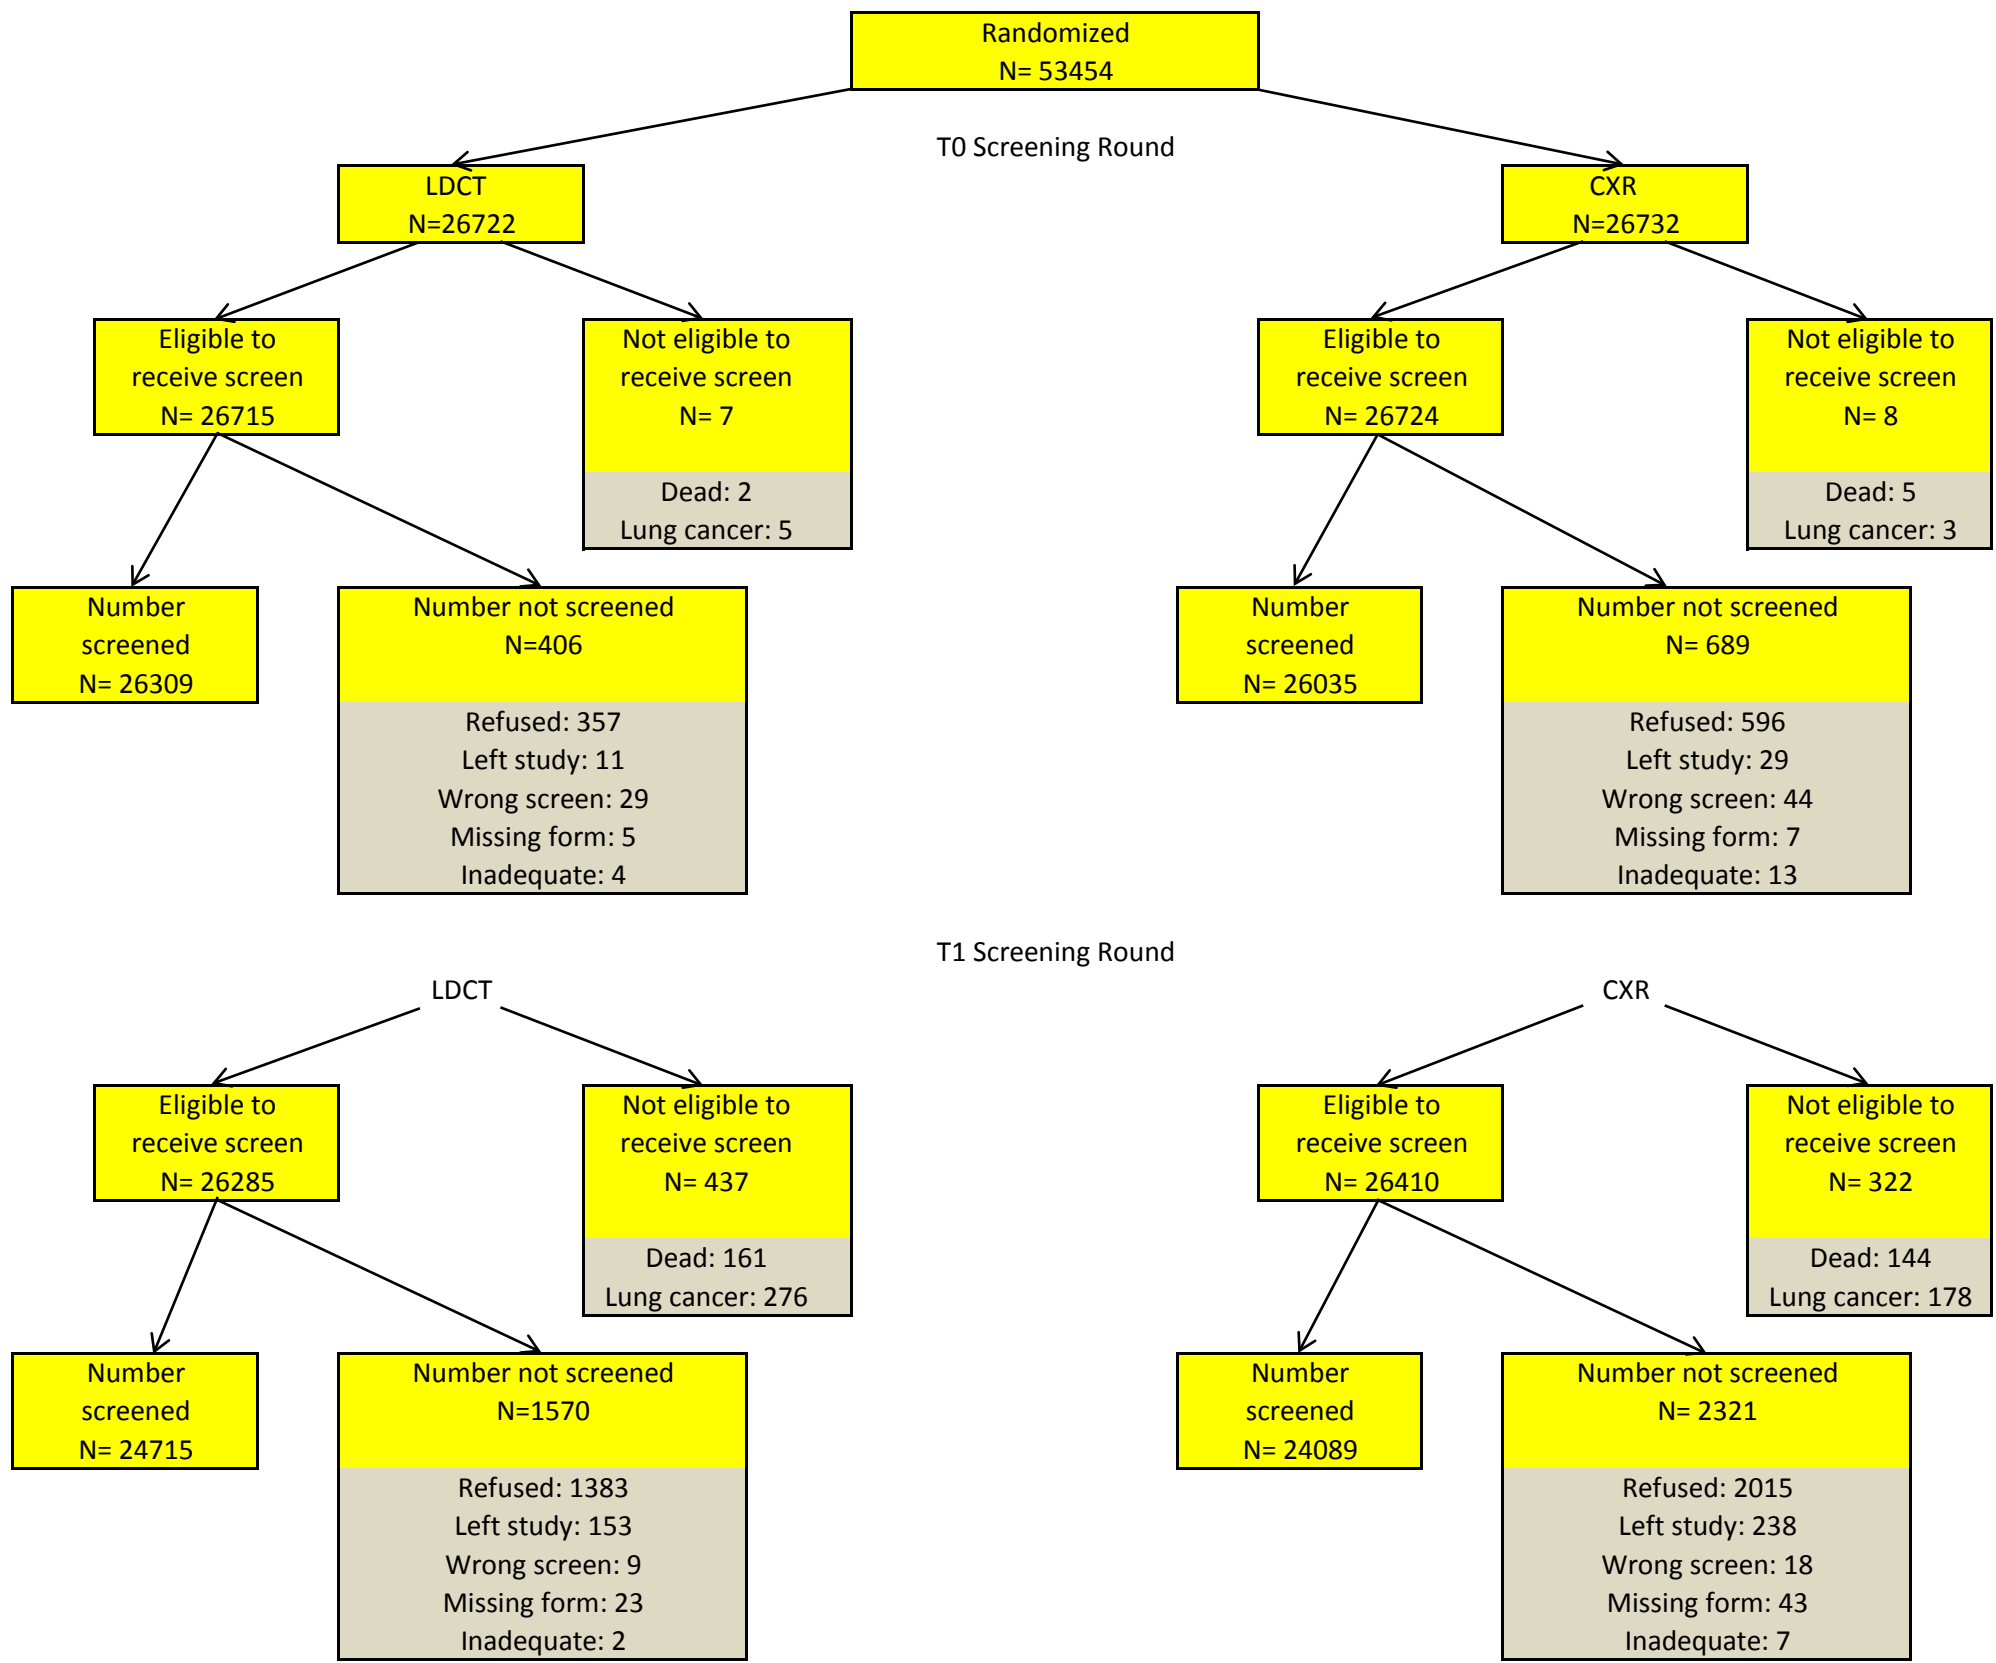

T2 Screening Round

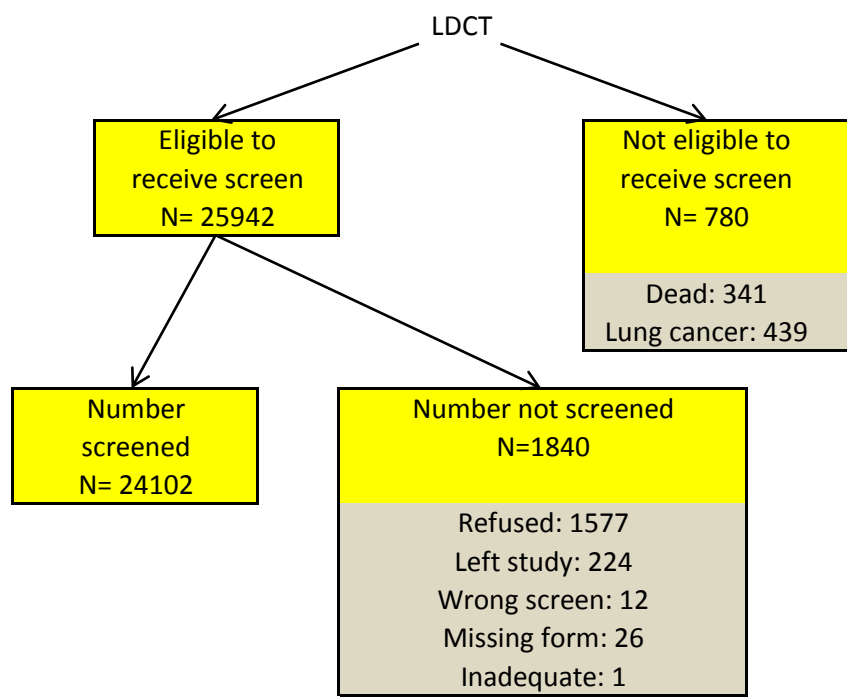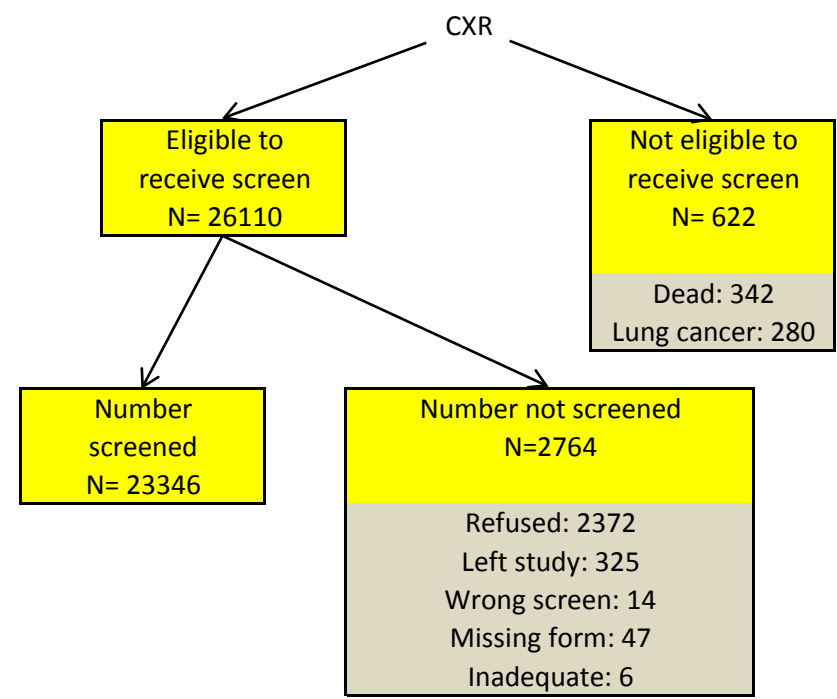

T3-T8  
Follow-up

Lung cancer mortality  
Deaths through January 15, 2009

Analyzed: N= 53454  
Excluded: N= 0

All-cause mortality  
Deaths through December 31, 2009

Analyzed: N= 53454  
Excluded: N= 0
